# Supplementary material for: Durable antifouling polyvinylidene fluoride membrane via surface zwitterionicalization mediated by an amphiphilic copolymer
Source: Royal Society of Chemistry journal article supplement (doi:10.1039/c6ra20079f), 2016-01-01
Supplement: c6ra20079f1.pdf [file c6ra20079f1.pdf]

## Supplementary Information

# Durable antifouling polyvinylidene fluoride membrane via surface zwitterionization mediated by amphiphilic copolymer

Mengyuan Shi, Jing Zhu, Chunju He\*

*The State Key Laboratory for Modification of Chemical Fibers and Polymer Materials*

*College of Materials Science and Engineering*

*Donghua University*

*Shanghai, 201620, P.R.China*

\*Corresponding author: Chunju He, [chunjuhe@dhu.edu.cn](mailto:chunjuhe@dhu.edu.cn)

TEL: 86-21-67792842

FAX: 86-21-67792855

## Membrane surface zwitterionicalization

The blending membranes were further surface zwitterionicalization by the quaternization of PDMAEMA segments with 3-BPA. Typically, a fabricated blend membrane was immersed into a 0.05 g/ml of 3-BPA (ethanol as solvent) and shaken at 50 °C for 12h, taken out and immersed into deionized water and ethanol alternately for test.

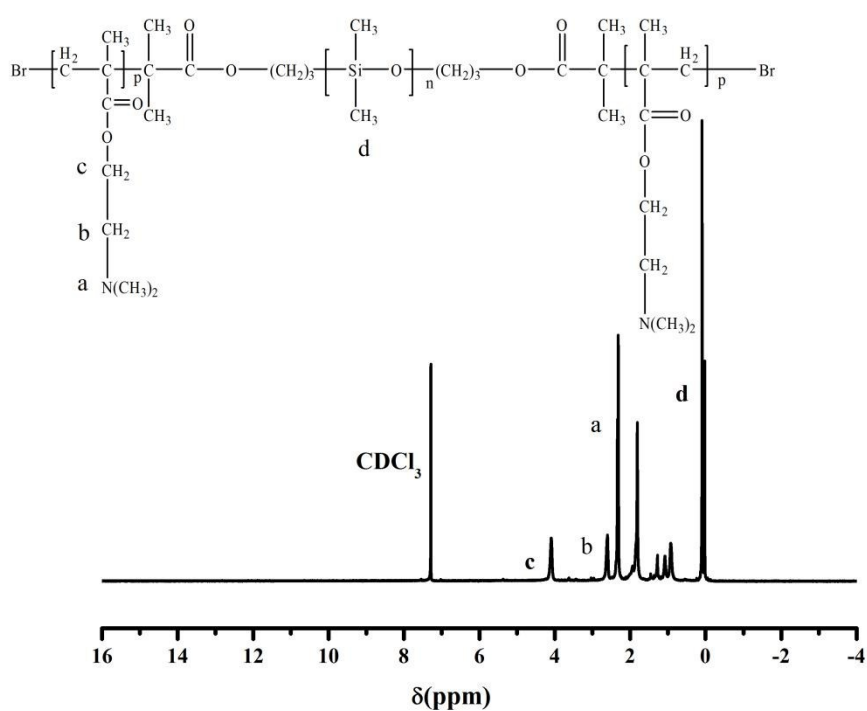

Fig. S1. <sup>1</sup>H NMR spectrum of PDMAEMA-PDMS-PDMAEMA

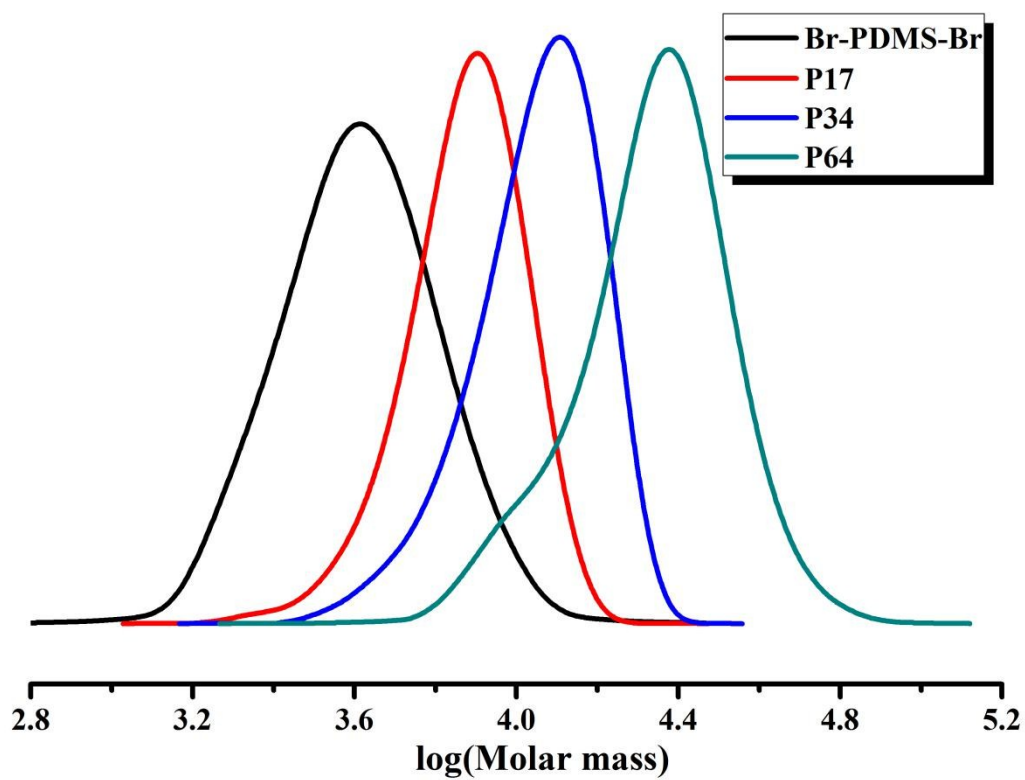

**Fig. S2.** GPC traces of Br-PDMS-Br and PDMAEMA-b-PDMS-b-PDMAEMA (P17, P34 and P64)

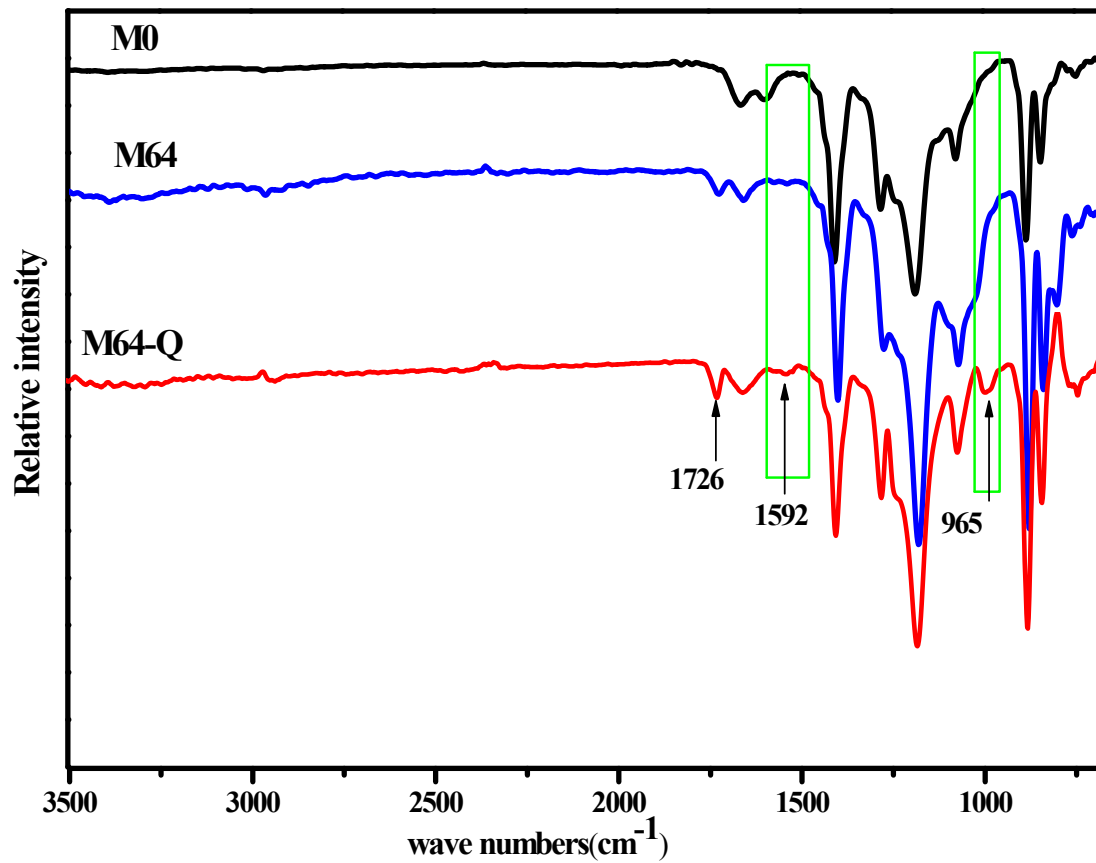

Fig. S3. FTIR/ATR spectra for the membranes of M0, M64 and M64-Q (after quaternization).
